# Supplementary material
Source: PubMed Central journal article supplement (PMC5560806)
Supplement: 2053File001.pdf [file 2053File001.pdf]

**Supplemental Information**

**Supplementary Figures**

**Supplementary Tables**

# FigS1

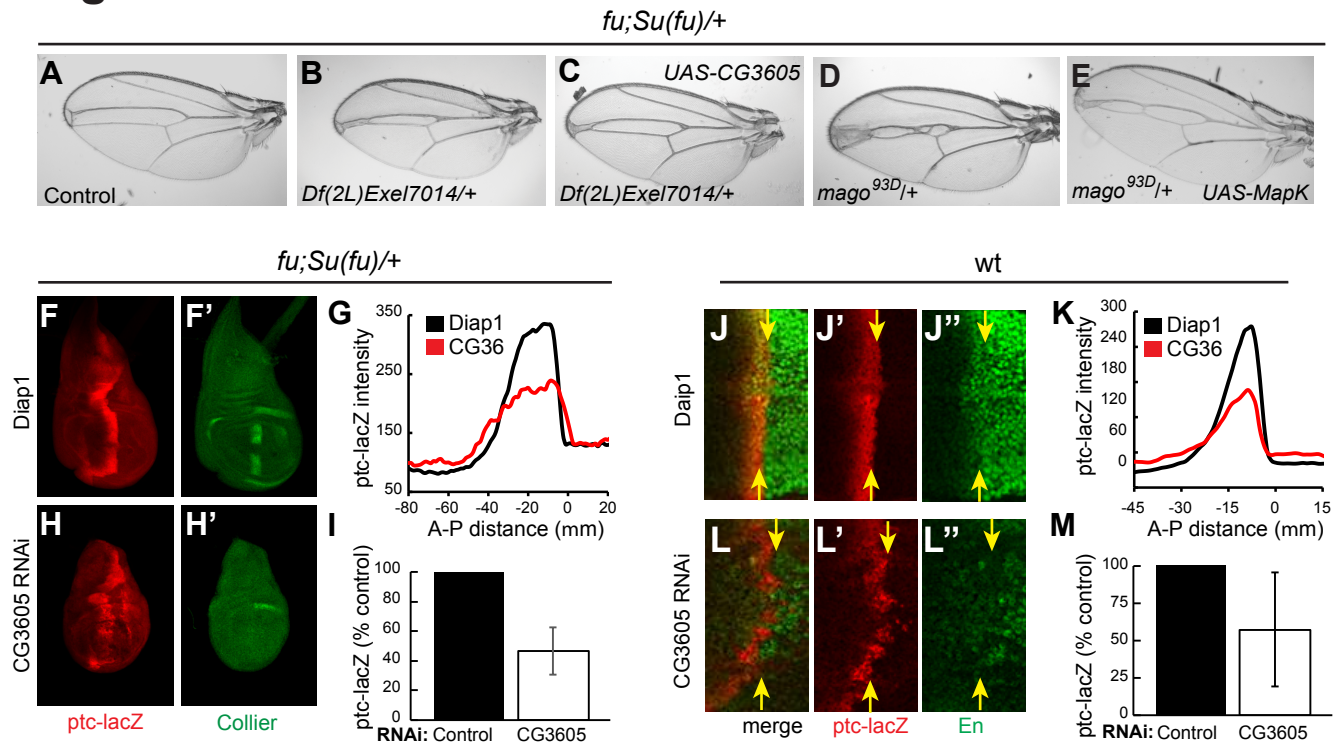

**Fig. S1. CG3605, implicated in RNA splicing, modifies Hh pathway activity.**

(A-C) Vein 3-4 spacing in (A) *fu; Su(fu)/+* males was (B) reduced by heterozygosity for a deficiency containing the CG3605 gene, and (C) was partially restored by expressing a *UAS-CG3605* cDNA transgene with *C765-GAL4*. (D, E) Narrowing of veins 3-4 in *fu; Su(fu)/+* flies due to (D) a heterozygous *mago<sup>93D</sup>* mutation was still evident when (E) *UAS-MapK* was expressed under the control of *C765-GAL4*. (F-I) Wing discs from *fu; Su(fu)/+* larvae had reduced expression of *ptc-lacZ* (red) and Collier (green) relative to wild-type (not shown). Both *ptc-lacZ* and Collier were reduced further by expressing (G-G') *UAS-CG3605 RNAi* together with *UAS-Diap1* compared to (F-F') *UAS-Diap1* controls using *C765-Gal4*. (H) Average *ptc-lacZ* intensity along the AP-axis for four wing discs in a single experiment comparing *UAS-CG3605 RNAi* to controls (both also express *UAS-Diap1*). (I) Maximal *ptc-lacZ* intensity as a percentage of control for discs expressing *CG3605 RNAi*, showing mean and 95% CI (n=4 experiments). (J-M) Central region (around DV and AP borders) of wing discs expressing (J) *UAS-Diap1* or (L) *UAS-CG3605 RNAi* plus *UAS-Diap1* under the control of *C765-Gal4*, stained for *ptc-lacZ* (red) and En (green). *CG3605 RNAi* reduced *ptc-lacZ* expression and Hh induction of anterior En (to the left of yellow arrows indicating the AP border). (K) *ptc-lacZ* intensity profiles along the AP-axis for *CG3605 RNAi* and controls for a single experiment (4 wing discs per condition). (M) Maximal *ptc-lacZ* intensity as a percentage of controls for discs expressing *CG3605 RNAi*, showing mean and 95% CI (n=3 experiments).

## FigS2

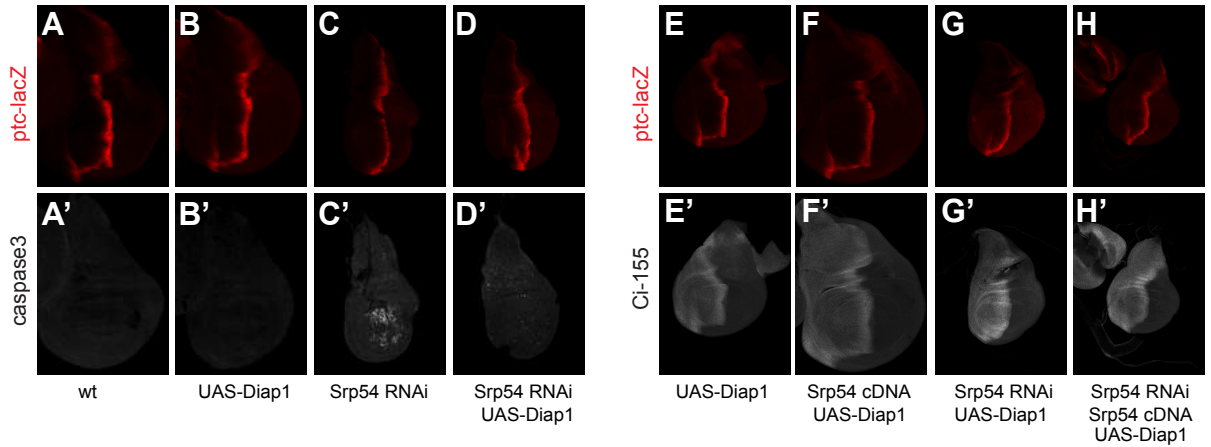

**Fig. S2. Rescue of cell death and aberrant wing disc morphology induced by *Srp54* RNAi.**

(A-D) Wing discs (C,D) with or (A,B) without *UAS-Srp54 RNAi* expression (A, C) alone or (B, D) together with *UAS-Diap1* under the control of *C765-GAL4*, stained for *ptc-lacZ* (red) and Caspase3 (white). Rescue of apoptosis by *UAS-Diap1* expression did not restore *ptc-lacZ* levels reduced by *Srp54 RNAi*. (E-H) Wing discs expressing *UAS-Diap1* (E) alone, or together with (F) *UAS-Srp54 cDNA*, (G) *UAS-Srp54 RNAi*, or (H) *UAS-Srp54 RNAi* and *UAS-Srp54 cDNA*. The expression of *UAS-Srp54 cDNA* prevented *ptc-lacZ* (red) reduction by *Srp54 RNAi* and prevented aberrantly high Ci-155 (white) in anterior cells caused by *Srp54 RNAi*.

# FigS3

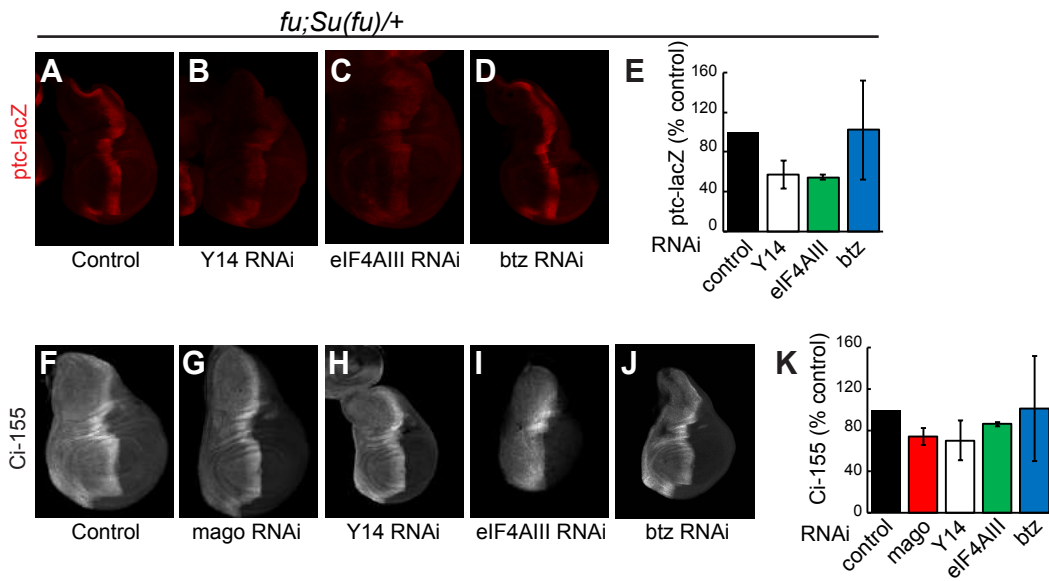

**Fig. S3. Core nuclear EJC members can modify Hh pathway activity.**

(A-D) Expression of *ptc-lacZ* (red) in (A) *fu; Su(fu)/+* wing discs was reduced by RNAi transgenes targeted to (B) *Y14* and (C) *eIF4AIII* but not (D) *btz* and expressed using *C765-GAL4*. (E) Maximal *ptc-lacZ* intensity as a percentage of controls for discs expressing the indicated RNAi transgenes, showing mean and 95% CI (n=3 experiments for each condition). (F-J) *Ci-155* (white) in wing discs expressing RNAi to the indicated EJC components. (K) Maximum *Ci-155* intensity in AP border cells as a percentage of controls for discs expressing the indicated RNAi transgenes using *C765-GAL4*, showing mean and 95% CI (n=3 experiments for each condition).

# FigS4

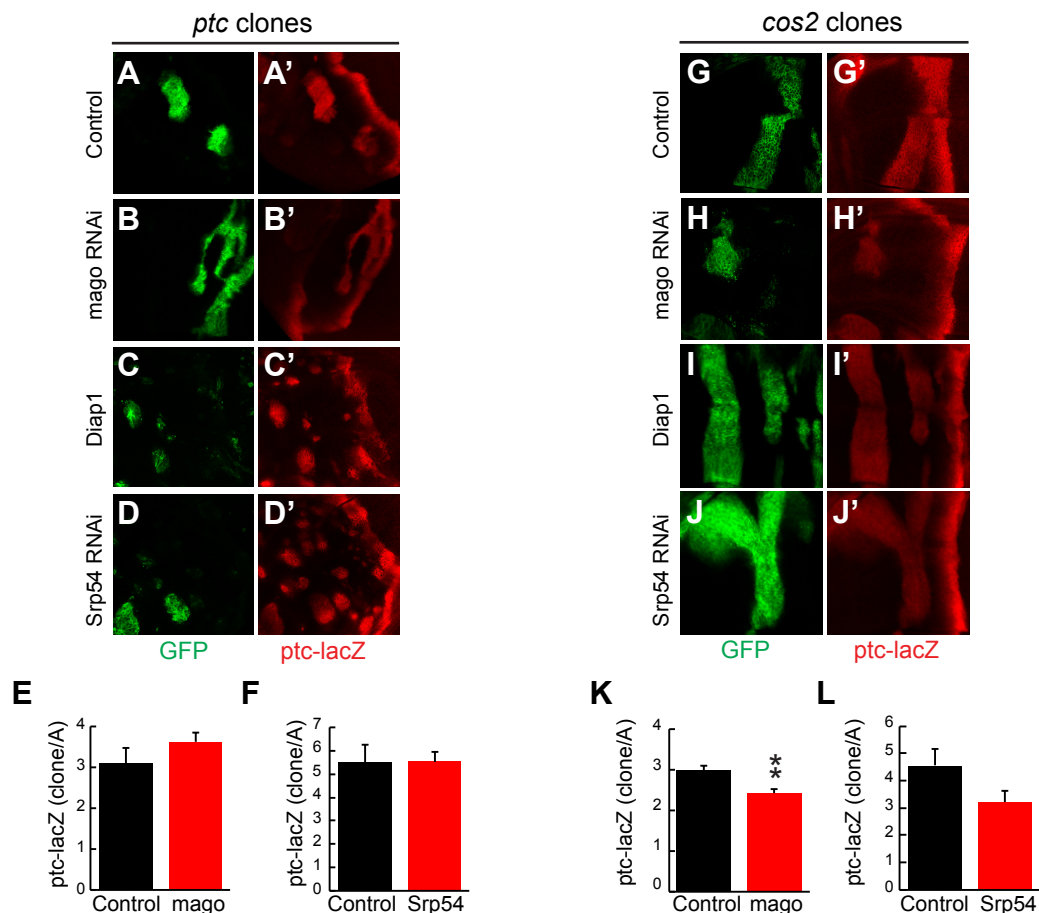

**Fig. S4. Effects of mago RNAi and Srp54 RNAi on Hh pathway activity in *ptc* and *cos2* clones.**

(A-F) Ectopic *ptc-lacZ* (red) induced in anterior *ptc* clones (marked by GFP, green) was unaffected by (B) *mago RNAi* or (D) *Srp54 RNAi* compared to (A, C) controls. (E,F) *ptc-lacZ* intensity relative to controls within *ptc* clones, showing mean, SEM and significant differences calculated by Student's t-test ( $p > 0.05$ ), using (E)  $n=6$  control and  $n=5$  experimental clones and (F)  $n=8$  control and  $n=11$  experimental clones. (G-L) Ectopic *ptc-lacZ* (red) induced in anterior *cos2* clones (marked by GFP, green) was slightly reduced by (H) *mago RNAi* and (J) *Srp54 RNAi* compared to (G, I) controls. (K,L) *ptc-lacZ* intensity relative to controls within *cos2* clones, showing mean, SEM and significant differences calculated by Student's t-test ( $*p < 0.01$ ), using (K)  $n=11$  control and  $n=15$  experimental clones and (L)  $n=8$  control and  $n=6$  experimental clones.

**Table S1. Deficiencies that altered v3-v4 spacing in the sensitized screen and likely genes responsible.**

| Cytology | Stock | Deficiency (Df)    | v3-v4 spacing | Associated Gene      | Phenocopy for Overlapping Df Stocks |                         |
|----------|-------|--------------------|---------------|----------------------|-------------------------------------|-------------------------|
|          |       |                    |               |                      | Yes +                               | No -                    |
| 23C      | 7784  | Df(2L)<br>Exel7014 | Narrower (-)  | <i>CG3605</i>        | 24121                               | 23147<br>9713           |
| 30D-E    | 9715  | Df(2L)<br>BSC240   | Narrower (-)  | <i>srp54</i>         | 8042<br>8041<br>7816                | 7508                    |
| 32E-F    | 9716  | Df(2L)<br>BSC241   | Narrower (-)  | <i>salr and salm</i> | 7512<br>29717                       | 7511                    |
| 42E-43D  | 9062  | Df(2R)<br>ED1673   | Wider (+)     | <i>cos2</i>          |                                     |                         |
| 44F-45F  | 9063  | Df(2R)<br>ED1791   | Narrower (-)  | <i>tsu</i>           | 23167                               | 23166                   |
| 47A      | 25248 | Df(2R)<br>BSC595   | Narrower (-)  |                      | 9277                                | 25729                   |
| 66C-D    | 27576 | Df(3L)<br>BSC815   | Narrower (-)  |                      | 26830                               | 24400<br>9544<br>24413  |
| 77B-C    | 27917 | Df(3L)<br>BSC839   | Narrower (-)  |                      | 21113                               | 26832<br>24951<br>27369 |
| 78C-F    | 8101  | Df(3L)<br>ED4978   | Narrower (-)  |                      | 24939                               | 24922<br>23669          |
| 87B-E    | 24990 | Df(3R)<br>BSC486   | Wider (+)     | <i>Su(fu)</i>        |                                     |                         |
| 94F-95D  | 24993 | Df(3R)<br>BSC489   | Narrower (-)  |                      | 7991                                | 7674<br>7992            |
| 96B-D    | 24965 | Df(3R)<br>BSC461   | Narrower (-)  |                      | 27923                               | 7680<br>24998<br>7994   |

**Table S2. Primers used for molecular cloning and mutagenesis.**

| Name                      | Sequence 5'-3'                                   |
|---------------------------|--------------------------------------------------|
| Forward CiF1 RsrII        | CAC <u>CCGGTCCG</u> GCCAAAAGAAAATTATGTTGGC       |
| Reverse CiF1 PmeI         | <u>ATGTTTAAAC</u> GGGGAGGCCATTGCAATTG            |
| Forward CiF1 ATG-B mut    | GAATACA <u>ACTGTTCCA</u> AGTATCCGGGAATTCTATAGGCC |
| Reverse CiF1 ATG-B mut    | GGCCTATAGAATTCCCGGATAC <i>TTGGAACAGTTGTATTC</i>  |
| Forward CiF1 ATG-A mut    | GGACTAACTTTAATGAAAAGGACGCCTACGC                  |
| Reverse CiF1 ATG-A mut    | GCGTAGGCGTCC <i>TTTT</i> CATTAAAGTTAGTCC         |
| Forward ci cDNA           | CACCGACGTCATTCTTGTGGACTAAC                       |
| Reverse ci cDNA XbaI      | <u>ATTCTAGAT</u> TACTGCATCATTTGAAGGTATC          |
| Forward ci 3'UTR NotI     | <u>AGCGGCCGC</u> AAAATGTTATCTAGCTAACACTG         |
| Reverse ci 3'UTR PaeI     | CAC <u>CTTAATTA</u> AGGCGAATTGGGTACCCACG         |
| Forward ci SV40 NotI      | <u>AGCGGCCGC</u> GACTAGAGATCATAATCAGCC           |
| Reverse ci 3'SV40 PaeI    | CAC <u>CTTAATTA</u> AGTTCGACACTAGTGGATCCAG       |
| Forward Srp54 cDNA        | CACCATAAACTGGCAAACATGGCTGG                       |
| Reverse Srp54 cDNA XhoI   | AT <u>CTCGAGCT</u> AGGTCTAGGGCGAGTTGG            |
| Forward CG3605 cDNA EcoRI | CACCAG <u>AATTC</u> TTAATTTATGGCGGACCAGTTG       |
| Reverse CG305 cDNA KpnI   | ATGGTACCGTCAA <u>ACTAAA</u> ACTTGAACCTCCTTG      |

Underlined letters are the added restriction enzyme sites and the italic letters represent changes from original *ci* sequence. Forward primers, used for cloning, start with a CACC sequence to enable cloning into p-ENTRY-D-Topo vector.

**Table S3. Pair of primers used for RNA analysis.**

| <b>Name</b>   | <b>Sequence 5'-3'</b>     |
|---------------|---------------------------|
| ci RNA Left   | attcagcttcacatctttcacgat  |
| ci RNA Right  | tcacccaaagagctcaaacc      |
| ci E1A Left   | acgacgtcattcttgtgtg       |
| ci E1B Left   | aactgctccatctaaactaacg    |
| ci E2 Right   | tgtaccgagcttgaaacgctc     |
| ci E2 Left    | gcagtttttagcgtccagg       |
| ci E3 Right   | gcccaaaaaatcagctgatcc     |
| ci E3 Left    | atgacaccacaacaagttgc      |
| ci E4 Right   | tcggcttctactgtgctac       |
| ci E4 Left    | tcgatgggaagattgtacacg     |
| ci E5 Right   | ttgctacatcccggatactc      |
| ci E5 Left    | accatacactgcgagtatcc      |
| ci E6 Right   | gagagttgcgctcatttagagg    |
| ci E1AB Right | gttaatgtcgctcagtccac      |
| MapK Right    | tgcacatccctatttagagcaa    |
| MapK Left     | aatggcacttcagcgacag       |
| ptc Right     | caacgacgtcttcgcctac       |
| ptc Left      | gaaaatactggcgcggttc       |
| Rpl15 Right   | aagccgaagagtcattggtgt     |
| Rpl15 Left    | cgccaagtctacgaccaac       |
| Rp49 Right    | ttccttgacgtgccaaaact      |
| Rp49 Left     | aatgatctataacaaaatcccctga |
